# Supplementary material for: Wild Food Plants and Trends in Their Use: From Knowledge and Perceptions to Drivers of Change in West Sumatra, Indonesia
Source: PubMed Central journal article supplement (PMC7555794; doi:10.3390/foods9091240), 2020-09-04
Supplement: foods-09-01240-s001.pdf [file foods-09-01240-s001.pdf]

**Table S1** Wild food plants used by Minangkabau and Mandailing women in Pasaman regency, West Sumatra, Indonesia

| Plant species and voucher number                          | Plant family   | Local names                                  | Local food category | Part used and extent of use | Cited by % of respondents | Habitat    |
|-----------------------------------------------------------|----------------|----------------------------------------------|---------------------|-----------------------------|---------------------------|------------|
| <b>Food group: Starchy staples</b>                        |                |                                              |                     |                             |                           |            |
| <i>Manihot esculenta</i> C rantz                          | Euphorbiaceae  | Ubi singkong, Ubi kayu (Mi, Ma)              | Staple food/snack   | Tuber ++                    | 74 (30 Ma; 44 Mi)         | Ag, Ho, Fi |
| <i>Colocasia esculenta</i> (L.) Schott (LP16)             | Araceae        | Talas (Mi); Suhat (Ma)                       | Staple food/snack   | Tuber +                     | 53 (16 Ma; 37 Mi)         | Ae, Af, Fi |
| <i>Ipomoea batatas</i> (L.) Poir.                         | Convolvulaceae | Ubi jalar (Mi, Ma)                           | Staple food/snack   | Tuber +                     | 25 (30 Ma; 44 Mi)         | Fi, Hg     |
| <i>Xanthosoma sagittifolium</i> (L.) Schott (LP56)        | Araceae        | Talas hitam (Mi)                             | Staple food/snack   | Tuber -                     | 1 (0 Ma; 1 Mi)            | Af         |
| <b>Food group: Pulses</b>                                 |                |                                              |                     |                             |                           |            |
| <i>Archidendron pauciflorum</i> (Benth.) I.C.Nielsen      | Leguminosae    | Jariang (Mi); Joring (Ma); Jengkol (Mi, Ma)  | Vegetable           | Seed ++++                   | 14 (4 Ma; 10 Mi)          | Af         |
| <i>Parkia speciosa</i> Hassk.                             | Leguminosae    | Petai (Mi, Ma)                               | Vegetable           | Seed ++++                   | 7 (4 Ma; 3 Mi)            | Af         |
| <i>Archidendron bubalinum</i> (Jack) I.C.Nielsen          | Leguminosae    | Kabau, Sikabau (Mi); Kaladeh (Ma)            | Vegetable           | Seed ++                     | 3 (0 Ma; 3 Mi)            | Af         |
| <i>Parkia speciosa</i> Hassk. (LP17)                      | Leguminosae    | Potar, Parira, Petai hutan (Ma)              | Vegetable           | Seed +                      | 1 (1 Ma; 0 Mi)            | Af, Fo     |
| Species not identified (LP41)                             | Leguminosae    | Kacang tujuh lembar daun (Mi)                | Vegetable/bean      | Seed +                      | 0 (0 Ma; 1 Mi)            | Af, Fi     |
| <i>Vigna unguiculata</i> 'kacang tunjuk' (LP35)           | Leguminosae    | Kacang tunjuk (Mi, Ma)                       | Vegetable/bean      | Seed -                      | Only FGD (Mi, Ma)         | Fi, Hg     |
| <b>Food group: Nuts and Seeds</b>                         |                |                                              |                     |                             |                           |            |
| <i>Artocarpus</i> sp.                                     | Moraceae       | Nangka hutan (Mi); Nangka/Sibodak rimbo (Ma) | Vegetable           | Fruit (unripe) +            | 13 (3 Ma; 10 Mi)          | Fo         |
| <i>Pangium edule</i> Reinw.                               | Achariaceae    | Siwamang (Mi); Hapesong (Ma)                 | Fruit               | Seed +                      | 2 (0 Ma; 2 Mi)            | Af         |
| <i>Gnetum gnemon</i> L. (LP53)                            | Gnetaceae      | Melinjo (Mi, Ma)                             | Fruit               | Seed +                      | Only FGD (Mi, Ma)         | Af, Fi     |
| <i>Elateriospermum tapos</i> Blume (LP43)                 | Euphorbiaceae  | Tapuih (Mi)                                  | Fruit               | Seed -                      | Only FGD (Mi)             | Af, Fo     |
| <i>Artocarpus altilis</i> (Parkinson ex F.A.Zorn) Fosberg | Moraceae       | Hunur (Ma)                                   | Vegetable           | Seed +                      | 0 (1 Ma; 0 Mi)            | Af, Hg     |
| <b>Food group: Leafy vegetables</b>                       |                |                                              |                     |                             |                           |            |
| <i>Diplazium esculentum</i> (Retz.) Sw. (LP08)            | Woodsiaceae    | Pahu (Mi); Pakis (Ma)                        | Vegetable           | Leaf ++++                   | 163 (69 Ma; 94 Mi)        | Ae, Fo     |

**Table S1** Continued

| Plant species and voucher number                               | Plant family   | Local names                                                   | Local food category | Part used and extent of use | Cited by % of respondents | Habitat       |
|----------------------------------------------------------------|----------------|---------------------------------------------------------------|---------------------|-----------------------------|---------------------------|---------------|
| <i>Ipomoea aquatica</i> Forssk.                                | Convolvulaceae | Kangkung air<br>Kangkuang (Mi);<br>Kengkong,<br>Kangkung (Ma) | Vegetable           | Leaf, stem<br>++++          | 122 (73 Ma; 49 Mi)        | Ae, Rf        |
| <i>Manihot esculenta</i> Crantz                                | Euphorbiaceae  | Pucuk ubi, Daun<br>singkong (Mi, Ma)                          | Vegetable           | Leaf<br>++++                | 77 (36 Ma; 41 Mi)         | Ag, Fi,<br>Hg |
| <i>Solanum americanum</i> Mill. (LP19)                         | Solanaceae     | Lumai (Mi); Ranti<br>(Ma)                                     | Vegetable           | Leaf, stem<br>++            | 76 (44 Ma; 32 Mi)         | Ag, Fi,<br>Hg |
| <i>Limnocharis flava</i> (L.)<br>Buchenau                      | Alismataceae   | Genjer (Mi),<br>Kalanyoe (Ma)                                 | Vegetable           | Leaf, stem<br>++            | 60 (32 Ma; 28 Mi)         | Ae, Rf        |
| <i>Amaranthus hybridus</i> L. (LP49)                           | Amaranthaceae  | Bayam, Bayam liar<br>(Mi); Siarum (Ma)                        | Vegetable           | Leaf, stem<br>+++           | 42 (30 Ma; 12 Mi)         | Af, Fi,<br>Hg |
| <i>Carica papaya</i> L.                                        | Caricaceae     | Daun papaya (Mi),<br>Bulung botik (Ma)                        | Vegetable           | Leaf<br>+++                 | 34 (18 Ma; 16 Mi)         | Af, Fi,<br>Hg |
| <i>Claoxylon longifolium</i> (Blume) Endl. ex<br>Hassk. (LP28) | Euphorbiaceae  | Sitopu, Sitapu (Mi,<br>Ma); Daun manis<br>(Ma)                | Vegetable           | Leaf<br>++                  | 23 (6 Ma; 17 Mi)          | Af            |
| <i>Sauropus androgynus</i> (L.)<br>Merr.                       | Phyllanthaceae | (Daun-) Katuk,<br>Taruak manih (Mi);<br>Nasi-nasi (Ma)        | Vegetable           | Leaf<br>+++                 | 20 (13 Ma; 7 Mi)          | Af, Fi,<br>Hg |
| <i>Neptunia oleracea</i><br>Lour. (LP15)                       | Leguminosae    | Komen, Koman<br>(Ma)                                          | Vegetable           | Leaf, stem<br>++            | 13 (13 Ma; 0 Mi)          | Ae, Rf        |
| <i>Moringa oleifera</i> Lam.<br>(LP22)                         | Moringaceae    | (Daun-) Kelor (Mi),<br>Barrunge (Ma)                          | Vegetable           | Leaf<br>++                  | 10 (10 Ma; 0 Mi)          | Hg, Fi        |
| <i>Rorippa indica</i> (L.)<br>Hiern (LP30)                     | Brassicaceae   | Lobak kampung/<br>lokal (Mi, Ma)                              | Vegetable           | Leaf<br>+                   | 6 (3 Ma; 3 Mi)            | Af, Fi        |
| <i>Plukenetia corniculata</i> Sm.                              | Euphorbiaceae  | Pina-Pina (Ma)                                                | Vegetable           | Leaf<br>+                   | 6 (6 Ma; 0 Mi)            | Af            |
| <i>Brassica</i> spp.                                           | Brassicaceae   | Sawi, Sabi (Mi, Ma)                                           | Vegetable           | Leaf<br>++                  | 6 (3 Ma; 3 Mi)            | Af, Fi        |
| <i>Lactuca indica</i> L.<br>(LP23)                             | Compositae     | Sijungkat (Ma)                                                | Vegetable           | Leaf<br>+                   | 4 (4 Ma; 0 Mi)            | Af, Fi        |
| <i>Amaranthus</i> sp.<br>(LP31)                                | Amaranthaceae  | Bayam angkik/<br>duri/putih (Mi, Ma)                          | Vegetable           | Leaf, stem<br>+             | 3 (3 Ma; 1 Mi)            | Af, Fi,<br>Hg |
| <i>Syzygium malaccense</i> ;<br><i>Syzygium</i> sp.            | Myrtaceae      | Pucuk jambak (Mi,<br>Ma)                                      | Vegetable           | Leaf, shoot<br>+            | 3 (0 Ma; 3 Mi)            | Af, Hg        |
| <i>Cucurbita moschata</i><br>Duchesne                          | Cucurbitaceae  | Pucuk labu (Mi);<br>Bulung jelok (Ma)                         | Vegetable           | Leaf, shoot<br>+            | 3 (2 Ma; 1 Mi)            | Af, Fi,<br>Hg |
| <i>Nasturtium officinale</i><br>R.Br.                          | Brassicaceae   | Sayur paret, Selada<br>sawah (Mi)                             | Vegetable           | Leaf<br>-                   | 3 (0 Ma; 3 Mi)            | Rf            |
| <i>Hydrocotyle javanica</i><br>Thunb. (LP48)                   | Araliaceae     | Tubo aie/aek,<br>Pegagan (Mi)                                 | Vegetable           | Leaf<br>-                   | 2 (0 Ma; 2 Mi)            | Rf            |
| <i>Hibiscus sabdariffa</i> L.                                  | Malvaceae      | Asam ruso (Mi)                                                | Vegetable           | Leaf<br>+                   | 1 (0 Ma; 1 Mi)            | Hg            |
| <i>Gnetum gnemon</i> L.<br>(LP53)                              | Gnetaceae      | Daun melinjo (Ma)                                             | Vegetable           | Leaf<br>+                   | Only FGD (Ma)             | Af, Fi        |

**Table S1** Continued

| Plant species and voucher number                                                          | Plant family  | Local names                                                  | Local food category | Part used and extent of use | Cited by % of respondents | Habitat    |
|-------------------------------------------------------------------------------------------|---------------|--------------------------------------------------------------|---------------------|-----------------------------|---------------------------|------------|
| <i>Sechium edule</i> (Jacq.) Sw.                                                          | Cucurbitaceae | Bulung jepang (Ma)                                           | Vegetable           | Leaf, shoot<br>+            | 1 (1 Ma; 0 Mi)            | Af, Hg     |
| <i>Marsilea polycarpa</i> Hook. & Grev. (LP13)                                            | Marsileaceae  | Simmange (Mi);<br>Simmangah (Ma)                             | Vegetable           | Leaf<br>-                   | 1 (1 Ma; 0 Mi)            | Rf         |
| <i>Alternanthera sessilis</i> (L.) R.Br. ex DC. (LP34)                                    | Amaranthaceae | Kagama (Mi)                                                  | Vegetable           | Leaf<br>-                   | Only FGD (Mi)             | Rf         |
| <i>Cyathea junghuhniana</i> (Kunze) Copel. (LP07)                                         | Cyatheaceae   | Pahu (Mi); Pakis (Ma)                                        | Vegetable           | Leaf<br>+                   | 0 (1 Ma; 0 Mi)            | Ae, Af, Fo |
| <i>Oxalis barrelieri</i> L. (LP26)                                                        | Oxalidaceae   | Sayur asam (Ma)                                              | Vegetable           | Leaf<br>-                   | Only FGD (Ma)             | Af, Fi     |
| <b>Food group: Other vegetables</b>                                                       |               |                                                              |                     |                             |                           |            |
| <i>Bambusa vulgaris</i> Schrad. (LP12);<br><i>Gigantochloa atter</i> (Hassk.) Kurz (LP40) | Poaceae       | Rabuang (Mi);<br>Robung (Ma)                                 | Vegetable           | Shoot<br>++++               | 112 (41 Ma; 71 Mi)        | Af, Fo     |
| <i>Solanum rudepannum</i> Dunal                                                           | Solanaceae    | Rimbang (Mi, Ma);<br>Campur-campur (Ma)                      | Vegetable           | Fruit<br>++++               | 87 (31 Ma; 56 Mi)         | Af, Fi, Hg |
| <i>Etilingera elatior</i> (Jack) R.M.Sm. (LP02)                                           | Zingiberaceae | Kimcuang,<br>Sambuung (Mi);<br>Kimcong (Ma)                  | Vegetable           | Flower/fruit<br>++++        | 57 (6 Ma; 51 Mi)          | Af, Fo     |
| <i>Calamus exilis</i> Griff. (LP24)                                                       | Arecaceae     | Pucuk rotan (Mi);<br>Pangkat (Ma)                            | Vegetable           | Shoot<br>++                 | 22 (21 Ma; 1 Mi)          | Fo         |
| <i>Momordica charantia</i> L. (LP06)                                                      | Cucurbitaceae | Paria/Pariyo/Pare liar (Mi); Paria,<br>Paria-paria liar (Ma) | Vegetable           | Fruit<br>++                 | 19 (5 Ma; 14 Mi)          | Af, Fi     |
| <i>Solanum ferox</i> L. (LP33)                                                            | Solanaceae    | Torung asam (Mi, Ma)                                         | Vegetable           | Fruit<br>++                 | 18 (1 Ma; 17 Mi)          | Af         |
| <i>Artocarpus</i> sp.                                                                     | Moraceae      | Nangka hutan (Mi);<br>Nangka rimbo (Ma)                      | Vegetable           | Fruit (unripe)<br>+         | 13 (3 Ma; 10 Mi)          | Fo         |
| <i>Solanum lycopersicum</i> LAM.                                                          | Solanaceae    | Tomat liar (Mi, Ma)                                          | Vegetable           | Fruit<br>++                 | 12 (11 Ma; 1 Mi)          | Fi, Hg     |
| <i>Colocasia esculenta</i> (L.) Schott (LP57)                                             | Araceae       | Batang talas (Mi, Ma);<br>Suhat (Ma)                         | Vegetable           | Stem<br>+                   | 6 (1 Ma; 5 Mi)            | Af, Ae, Fi |
| <i>Sechium edule</i> (Jacq.) Sw.                                                          | Cucurbitaceae | Labu jepang/siam (Mi);<br>Bulung Jepang, Jepang (Ma)         | Vegetable           | Fruit<br>++                 | 5 (3 Ma; 2 Mi)            | Af, Hg     |
| <i>Momordica charantia</i> subsp. <i>abbreviata</i> (Ser.) Greb. (LP37)                   | Cucurbitaceae | Pariyo, Pio mancik (Mi)                                      | Vegetable           | Fruit<br>+                  | 4 (0 Ma; 4 Mi)            | Af, Fi     |
| <i>Carica papaya</i> L.                                                                   | Caricaceae    | Pepaya mudah (Mi, Ma);<br>Botik mudah (Ma)                   | Vegetable           | Fruit (unripe)<br>+         | 3 (1 Ma; 2 Mi)            | Af, Fi, Hg |

**Table S1** Continued

| Plant species and voucher number                             | Plant family   | Local names                                            | Local food category | Part used and extent of use | Cited by % of respondents | Habitat    |
|--------------------------------------------------------------|----------------|--------------------------------------------------------|---------------------|-----------------------------|---------------------------|------------|
| <i>Musa × paradisiaca</i> L.; <i>Musa</i> sp.                | Musaceae       | Jantung pisang, Tukua pisang (Mi); Jattung pisang (Ma) | Vegetable           | Flower ++                   | 2 (0 Ma; 2 Mi)            | Af, Hg     |
| <i>Arenga obtusifolia</i> Mart. (LP25)                       | Arecaceae      | Umbut puli (Ma)                                        | Vegetable           | Palm heart +                | 2 (0 Ma; 2 Mi)            | Fo         |
| Species not identified                                       | Arecaceae      | Umbut baih/langkok (Mi)                                | Vegetable           | Palm heart +                | 2 (0 Ma; 2 Mi)            | Fo         |
| <i>Averrhoa bilimbi</i> L.                                   | Oxalidaceae    | Asam belimbing (Mi, Ma); Belimbing besi (Mi)           | Vegetable           | Fruit +                     | 1 (0 Ma; 1 Mi)            | Af, Hg     |
| <i>Colocasia</i> spp.                                        | Araceae        | Batang/Taleh keladi (Mi); Keladi, Suhat (Ma)           | Vegetable           | Stem +                      | 1 (0 Ma; 1 Mi)            | Ae, Af     |
| <i>Xanthosoma sagittifolium</i> (L.) Schott (LP56)           | Araceae        | Batang talas hitam (Mi)                                | Vegetable           | Stem -                      | 1 (0 Ma; 1 Mi)            | Ae, Af     |
| <i>Pachyrhizus erosus</i> (L.) Urb. (LP03)                   | Leguminosae    | Benkuang (Mi, Ma)                                      | Vegetable           | Tuber +                     | 1 (1 Ma; 0 Mi)            | Af         |
| <i>Psophocarpus tetragonolobus</i> (L.) DC.                  | Leguminosae    | Kacang belimbing (Mi); Kacang jorbing (Ma)             | Vegetable           | Fruit +                     | 1 (0 Ma; 1 Mi)            | Af, Hg     |
| <i>Leucaena leucocephala</i> (Lam.) de Wit                   | Leguminosae    | Petai cina (Mi, Ma)                                    | Vegetable           | Fruit +                     | 1 (1 Ma; 0 Mi)            | Af, Fi, Hg |
| <i>Saccharum spontaneum</i> L. (LP01)                        | Poaceae        | Pira tobu, Tebu hitam (Ma)                             | Vegetable           | Stem +                      | 1 (1 Ma; 0 Mi)            | Af, Fi     |
| <i>Artocarpus</i> sp.                                        | Moraceae       | Hunur (Ma)                                             | Vegetable           | Fruit +                     | 1 (1 Ma; 0 Mi)            | Ae, Af     |
| <i>Colocasia gigantea</i> (Blume) Hook.f. (LP39)             | Araceae        | Batang/Taleh Kemumu (Mi)                               | Vegetable           | Stem -                      | Only FGD (Mi)             | Ae, Af, Fi |
| <i>Carica papaya</i> L.                                      | Caricaceae     | Bunga papaya (Mi, Ma); Bunga botiak (Ma)               | Vegetable           | Flower +                    | Only FGD (Mi, Ma)         | Af, Fi, Fo |
| <i>Ananas comosus</i> (L.) Merr.                             | Bromeliaceae   | Naneh/Nenas mudo (Mi)                                  | Vegetable           | Fruit (unripe) +            | Only FGD (Mi)             | Af, Fi, Hg |
| <i>Musa acuminata</i> Colla                                  | Musaceae       | Pisang hutan (Ma)                                      | Vegetable           | Stem -                      | Only FGD (Ma)             | Fo         |
| <i>Calamus manan</i> Miq. (LP38)                             | Arecaceae      | Tabu-tabu (Mi)                                         | Vegetable           | Shoot -                     | Only FGD (Mi)             | Fo         |
| <b>Food group: Other fruits</b>                              |                |                                                        |                     |                             |                           |            |
| <i>Baccaurea racemosa</i> (Reinw. ex Blume) Müll.Arg. (LP11) | Phyllanthaceae | Kapunduang (Mi, Ma)                                    | Fruit               | Fruit +++                   | 87 (37 Ma; 50 Mi)         | Af, Fo     |
| <i>Durio zibethinus</i> L., <i>Durio</i> sp. (LP59)          | Malvaceae      | Durian hutan/liar/batu/ma ngko (Mi; Ma)                | Fruit               | Fruit +++                   | 82 (38 Ma; 44 Mi)         | Fo         |

**Table S1** Continued

| Plant species and voucher number                        | Plant family    | Local names                                               | Local food category | Part used and extent of use | Cited by % of respondents | Habitat    |
|---------------------------------------------------------|-----------------|-----------------------------------------------------------|---------------------|-----------------------------|---------------------------|------------|
| <i>Psidium guajava</i> L.                               | Myrtaceae       | Jambu biji (Mi, Ma); Jambu paraweh (Mi); Jambu orsik (Ma) | Fruit               | Fruit<br>+++                | 40 (20 Ma; 20 Mi)         | Af, Fo, Hg |
| <i>Nephelium lappaceum</i> L. (LP20)                    | Sapindaceae     | Rambutan hutan/liar (Mi, Ma)                              | Fruit               | Fruit<br>++                 | 37 (22 Ma; 15 Mi)         | Fo         |
| <i>Lansium parasiticum</i> var. <i>Domesticum</i>       | Meliaceae       | Langsek (Mi); Latcat, Langsungat (Ma)                     | Fruit               | Fruit<br>++                 | 35 (11 Ma; 24 Mi)         | Af, Fo, Hg |
| <i>Clidemia hirta</i> (L.) D. Don (LP27)                | Melastomataceae | Karamunting (Mi); Haramunting (Ma)                        | Fruit               | Fruit<br>++                 | 29 (7 Ma; 22 Mi)          | Af, Fi, Fo |
| <i>Flacourtia rukam</i> Zoll. & Moritzi (LP44)          | Salicaceae      | Ukam, Rukam (Mi)                                          | Fruit               | Fruit<br>+                  | 25 (3 Ma; 22 Mi)          | Af, Fo     |
| <i>Hornstedtia conica</i> Ridl. (LP51)                  | Zingiberaceae   | Kudaro (Mi)                                               | Fruit               | Fruit<br>+                  | 24 (0 Ma; 24 Mi)          | Af, Fo     |
| <i>Artocarpus heterophyllus</i> Lam.                    | Moraceae        | Nangka (Mi, Ma)                                           | Fruit               | Fruit<br>+                  | 22 (7 Ma; 15 Mi)          | Fo         |
| Species not identified                                  |                 | Bonai, Limpanai (Mi)                                      | Fruit               | Fruit<br>+                  | 21 (0 Ma; 21 Mi)          | Af, Fo     |
| <i>Hornstedtia elongata</i> (Teijsm. & Binn.) K.Schum.  | Zingiberaceae   | Puah, Puahtok (Mi)                                        | Fruit               | Fruit<br>+                  | 20 (0 Ma; 20 Mi)          | Af, Fo     |
| <i>Salacca sumatrana</i> Becc.                          | Arecaceae       | Salak lokal/liar/hutan (Mi, Ma)                           | Fruit               | Fruit<br>++                 | 20 (6 Ma; 14 Mi)          | Af, Fo     |
| <i>Syzygium aqueum</i> (Burm.f.) Alston (LP04)          | Myrtaceae       | Jambu air, Jambu madu (Mi); Jambu aek/aie (Ma)            | Fruit               | Fruit<br>++                 | 18 (10 Ma; 8 Mi)          | Af, Fo, Hg |
| <i>Melastoma malabathricum</i> L. (LP18)                | Melastomataceae | Sikaduduak (Mi); Sikaduduk (Ma)                           | Fruit               | Fruit<br>++                 | 15 (3 Ma; 12 Mi)          | Af, Fi, Fo |
| <i>Baccaurea motleyana</i> (Müll.Arg.) Müll.Arg. (LP47) | Phyllanthaceae  | Rambai, Rumbai (Mi), Rambe (Ma)                           | Fruit               | Fruit<br>+                  | 14 (9 Ma; 5 Mi)           | Af, Fo     |
| <i>Rubus buergeri</i> Miq. (LP61)                       | Rosaceae        | Cimparingek, Lancinek, Cilinek (Mi)                       | Fruit               | Fruit<br>+                  | 12 (0 Ma; 12 Mi)          | Af, Fo     |
| <i>Calamus</i> spp.                                     | Arecaceae       | Buah rotan (Mi); Sihim (Ma)                               | Fruit               | Fruit<br>+                  | 11 (7 Ma; 4 Mi)           | Fo         |
| <i>Lansium parasiticum</i> var. <i>duku</i>             | Meliaceae       | Duku (Mi, Ma)                                             | Fruit               | Fruit<br>+                  | 11 (5 Ma; 6 Mi)           | Af, Fo     |
| <i>Spondias dulcis</i> Parkinson                        | Anacardiaceae   | Kedongdong (Mi, Ma)                                       | Fruit               | Fruit<br>+                  | 11 (10 Ma; 1 Mi)          | Af, Fo     |
| <i>Musa x paradisiaca</i> L.                            | Musaceae        | Pisang (Mi, Ma)                                           | Fruit               | Fruit<br>++                 | 11 (5 Ma; 6 Mi)           | Af, Hg     |

**Table S1** Continued

| Plant species and voucher number                       | Plant family   | Local names                                                              | Local food category | Part used and extent of use | Cited by % of respondents | Habitat    |
|--------------------------------------------------------|----------------|--------------------------------------------------------------------------|---------------------|-----------------------------|---------------------------|------------|
| <i>Artocarpus elasticus</i> Reinw. ex Blume (LP21)     | Moraceae       | Tarok (Mi); Torop (Ma)                                                   | Fruit               | Fruit<br>+                  | 10 (3 Ma; 7 Mi)           | Af, Fo     |
| <i>Syzygium malaccense</i> (L.) Merr. & L.M.Perry      | Myrtaceae      | Jambu bol (Mi, Ma); Jambak (Mi)                                          | Fruit               | Fruit<br>++                 | 8 (3 Ma; 5 Mi)            | Af, Fo, Hg |
| <i>Ficus</i> sp.                                       | Moraceae       | Limpauang (Mi); Gala-gala (Ma)                                           | Fruit               | Fruit<br>-                  | 7 (3 Ma; 4 Mi)            | Af, Fo     |
| <i>Ananas comosus</i> (L.) Merr.                       | Bromeliaceae   | Nanas, Naneh (Mi); Onas, Nenas (Ma)                                      | Fruit               | Fruit<br>++                 | 5 (3 Ma; 2 Mi)            | Af, Fi, Hg |
| <i>Lansium parasiticum</i> (Osbeck) K.C.Sahni & Bennet | Meliaceae      | Aia-aia, Aie-aie (Mi)                                                    | Fruit               | Fruit<br>+                  | 4 (0 Ma; 4 Mi)            | Af, Hg     |
| <i>Physalis angulata</i> var. <i>Angulata</i> (LP62)   | Solanaceae     | Lapuik-lapuik, Pultak-pultak (Ma); Ciplokan (Mi)                         | Fruit               | Fruit<br>++                 | 4 (3 Ma; 1 Mi)            | Af, Fi     |
| <i>Nephelium mutabile</i> Blume (LP46)                 | Sapindaceae    | Polesan (Mi)                                                             | Fruit               | Fruit<br>+                  | 4 (0 Ma; 4 Mi)            | Af, Hg     |
| <i>Solanum americanum</i> Mill. (LP19)                 | Solanaceae     | Buah lumai (Mi); Buah ranti (Ma)                                         | Fruit               | Fruit<br>-                  | 2 (0 Ma; 2 Mi)            | Af, Fi, Hg |
| <i>Lansium parasiticum</i> (Osbeck) K.C.Sahni & Bennet | Meliaceae      | Garandan, Barandan (Mi)                                                  | Fruit               | Fruit<br>+                  | 2 (0 Ma; 2 Mi)            | Af, Hg     |
| <i>Callicarpa arborea</i> Roxb.                        | Lamiaceae      | Sinasi, Nasi-nasi (Mi)                                                   | Fruit               | Fruit<br>-                  | 0 (0 Ma; 1 Mi)            | Ag, Fi     |
| <b>Food group: Vitamin A-rich plants</b>               |                |                                                                          |                     |                             |                           |            |
| <i>Carica papaya</i> L.                                | Caricaceae     | Pepaya (Mi); Botiak liar (Ma)                                            | Fruit               | Fruit<br>++++               | 45 (22 Ma; 23 Mi)         | Af, Fi, Hg |
| <i>Passiflora foetida</i> L. (LP29)                    | Passifloraceae | Latuik-latuik, Markisa hutan (Mi, Ma); Rambutan akar (Mi); Sigambus (Ma) | Fruit               | Fruit<br>+++                | 44 (38 Ma; 44 Mi)         | Af, Fi, Fo |
| <i>Mangifera foetida</i> Lour.                         | Anacardiaceae  | Ambacang, Bacang, Macang, Mangga hutan (Mi); Ambacam (Ma)                | Fruit               | Fruit<br>++                 | 30 (10 Ma; 20 Mi)         | Af, Fo     |
| <i>Mangifera laurina</i> Blume (LP05)                  | Anacardiaceae  | Polam, Ampalam (Mi); Manga harrangan, Manga kampung (Ma)                 | Fruit               | Fruit<br>+                  | 15 (2 Ma; 13 Mi)          | Af, Fo     |
| <i>Mangifera quadrifida</i> Jack (LP52)                | Anacardiaceae  | Languang, Polam, Mangga hutan (Mi)                                       | Fruit               | Fruit<br>+                  | 13 (0 Ma; 13 Mi)          | Af, Fo     |

Abbreviations: Ae – aquatic environments, Af – agroforestry, Fi – fields, Fo – forests, Hg – home gardens, Rf – rice fields. Mi – Minangkabau language and ethnic, Ma – Mandailing language and ethnic. The extent of use is based on 4-cell analysis where: - means only past use; + used rarely by a few households; ++ used rarely by many households; +++ used frequently by a few households; ++++ used frequently by many households
